# Supplementary material for: Application of Weighted Gene Co-Expression Network Analysis to Metabolomic Data from an ApoA-I Knockout Mouse Model
Source: Molecules. 2024 Feb 2;29(3):694. doi: 10.3390/molecules29030694 (PMC10856800; doi:10.3390/molecules29030694)
Supplement: Supplementary file 1 [file molecules-29-00694-s001.zip › molecules-2781303-Supplementary material.xlsx]

## Sheet: Sheet1
Table S1. ME of all samples
	MEblue	MEgreen	MEyellow	MEbrown	MEturquoise	MEblack	MEred	MEgrey
8w_chow_A1	0.0383721	-0.208225	0.0833494	-0.0173448	0.379182	0.130507	-0.0473841	0.385244
8w_chow_A2	-0.137021	-0.180495	0.27368	0.073441	0.58764	0.0686023	-0.0720872	0.428438
8w_chow_A3	-0.16824	-0.17876	-0.0670324	0.0102822	0.309287	0.093792	-0.0930542	0.342144
8w_chow_A4	-0.099182	-0.257669	-0.0193108	0.078393	0.341216	0.0974636	-0.0260369	0.347071
8w_chow_A5	-0.133881	-0.286349	-0.169685	0.936912	0.23495	0.0988823	-0.0698743	0.312616
8w_chow_C1	-0.173822	-0.228049	-0.149237	-0.0632851	-0.1079	0.217563	0.964179	-0.0455371
8w_chow_C2	0.0636258	-0.17558	-0.174712	-0.0748317	-0.06553	0.132899	-0.0198283	-0.0384035
8w_chow_C3	-0.178097	-0.164094	-0.267994	-0.0422146	-0.0910942	0.27425	-0.0454188	-0.0805384
8w_chow_C4	-0.114244	-0.197966	-0.290132	-0.0672963	-0.0876408	0.396875	-0.0532955	0.00533401
8w_chow_C5	-0.146492	-0.211633	-0.19592	-0.0543082	0.00895675	0.471141	0.0157883	0.0783695
8w_chow_C6	0.200777	-0.175471	-0.175191	-0.114414	-0.112676	0.145906	-0.0202348	-0.0241936
8w_HFD_A1	0.140866	0.0216358	0.0275362	-0.0404981	-0.106182	-0.11585	0.0734868	-0.11377
8w_HFD_A2	-0.0467226	0.212389	0.507694	-0.0515719	-0.0145569	-0.271753	-0.0705675	-0.063274
8w_HFD_A3	-0.168508	0.164693	0.422417	0.0821397	-0.0343357	-0.172691	-0.040815	-0.0146883
8w_HFD_A4	-0.00054354	0.213479	0.0528523	-0.0341028	-0.136779	-0.194233	-0.0495022	-0.136212
8w_HFD_A5	0.111391	0.145411	0.15801	-0.0706212	-0.0957922	-0.159744	-0.0767281	-0.0610709
8w_HFD_A6	-0.215905	0.0569853	-0.193245	0.0353914	-0.154829	-0.112384	-0.0466294	-0.117526
8w_HFD_C1	0.345435	0.134972	0.0277623	-0.0966031	-0.0441908	-0.154335	-0.0386736	-0.0722658
8w_HFD_C2	-0.0605938	0.288162	0.28283	-0.104378	-0.140525	-0.232939	-0.0942906	-0.20134
8w_HFD_C3	0.199327	0.222599	0.0270564	-0.112265	-0.145207	-0.170731	-0.0365088	-0.21251
8w_HFD_C4	-5.88148e-06	0.29653	-0.0302487	-0.100625	-0.17738	-0.224718	-0.0719021	-0.242663
8w_HFD_C5	-0.154316	0.320963	0.0173703	-0.0539766	-0.179545	-0.221664	-0.0451197	-0.239245
8w_HFD_C6	0.69778	0.18647	-0.147849	-0.118222	-0.16707	-0.0968392	-0.0355024	-0.235979
